# Supplementary material for: The Arabidopsis H3K27me3 demethylase JUMONJI 13 is a temperature and photoperiod dependent flowering repressor
Source: PubMed Central journal article supplement (PMC6428840; doi:10.1038/s41467-019-09310-x), 2019-03-21
Supplement: 41467_2019_9310_MOESM3_ESM.pdf [file 41467_2019_9310_MOESM3_ESM.pdf]

## **Description of Additional Supplementary Files**

File Name: Supplementary Data 1

Description: List of differentially expressed genes in Col and jmj13.
